# Supplementary material for: Possibility of using a lithotrophic iron-oxidizing microbial fuel cell as a biosensor for detecting iron and manganese in water samples
Source: Royal Society of Chemistry journal article supplement (doi:10.1039/c5em00099h), 2015-01-01
Supplement: c5em00099h1.pdf [file c5em00099h1.pdf]

SUPPLEMENTAL MATERIAL FOR:

Journal: Environmental Science: Processes & Impacts

Manuscript: **POSSIBILITY OF USING A LITHOTROPHIC IRON-OXIDIZING MICROBIAL FUEL CELL AS A  
BIOSENSOR FOR DETECTING IRON AND MANGANESE IN WATER SAMPLES**

Phuong Hoang Nguyen Tran<sup>1</sup>, Tha Thanh Thi Luong<sup>1</sup>, Thuy Thu Thi Nguyen<sup>1</sup>, Huy Quang Nguyen<sup>1</sup>, Hop Van Duong,  
Byung Hong Kim<sup>3,4,5</sup> and Hai The Pham<sup>1,2,\*</sup>

<sup>1</sup>Center for Life Science Research, Faculty of Biology, Vietnam National University – University of Science, Nguyen Trai 334, Thanh Xuan, Hanoi, Vietnam

<sup>2</sup>Department of Microbiology, Faculty of Biology, Vietnam National University in Hanoi – University of Science, Nguyen Trai 334, Thanh Xuan, Hanoi, Vietnam

<sup>3</sup>Korea Institute of Science and Technology, Hwarangno 14-gil, 5 Seongbuk-gu, Seoul 136-791, Republic of Korea

<sup>4</sup>Fuel Cell Institute, National University of Malaysia, 43600 UKM, Bangi, Selangor, Malaysia

<sup>5</sup>School of Municipal and Environmental Engineering, Harbin Institute of Technology, 73 Huanghe Road, Nangang District, Harbin 150090, China

\* Corresponding author: Hai T. Pham; Department of Microbiology, Faculty of Biology, Vietnam National University in Hanoi – University of Science; phone: +84 (0)943 318 978; fax: +84 (04) 38582069; e-mail: [phamthehai@vnu.edu.vn](mailto:phamthehai@vnu.edu.vn), [hai.phamthe@gmail.com](mailto:hai.phamthe@gmail.com); webpage: <http://hus.edu.vn>

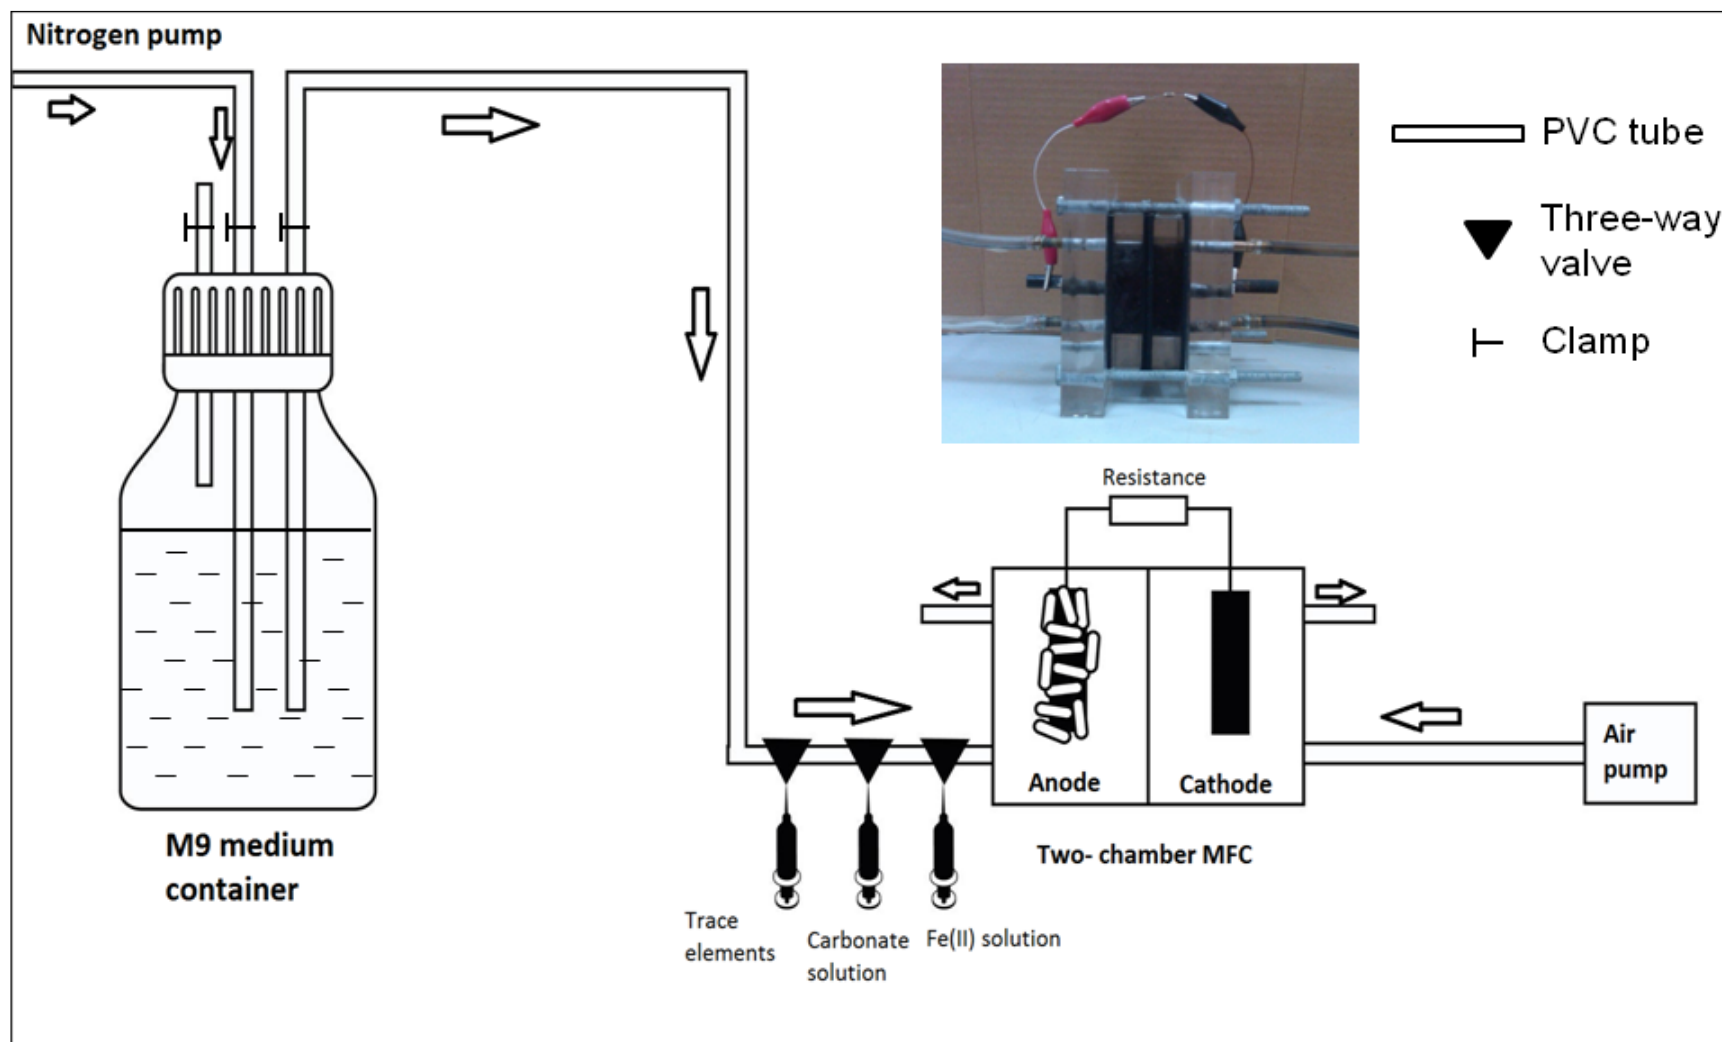

Figure S1. A diagram showing the setup of a LIO-MFC system in this study. Note: The inserted picture shows a real fabricated LIO-MFC reactor.

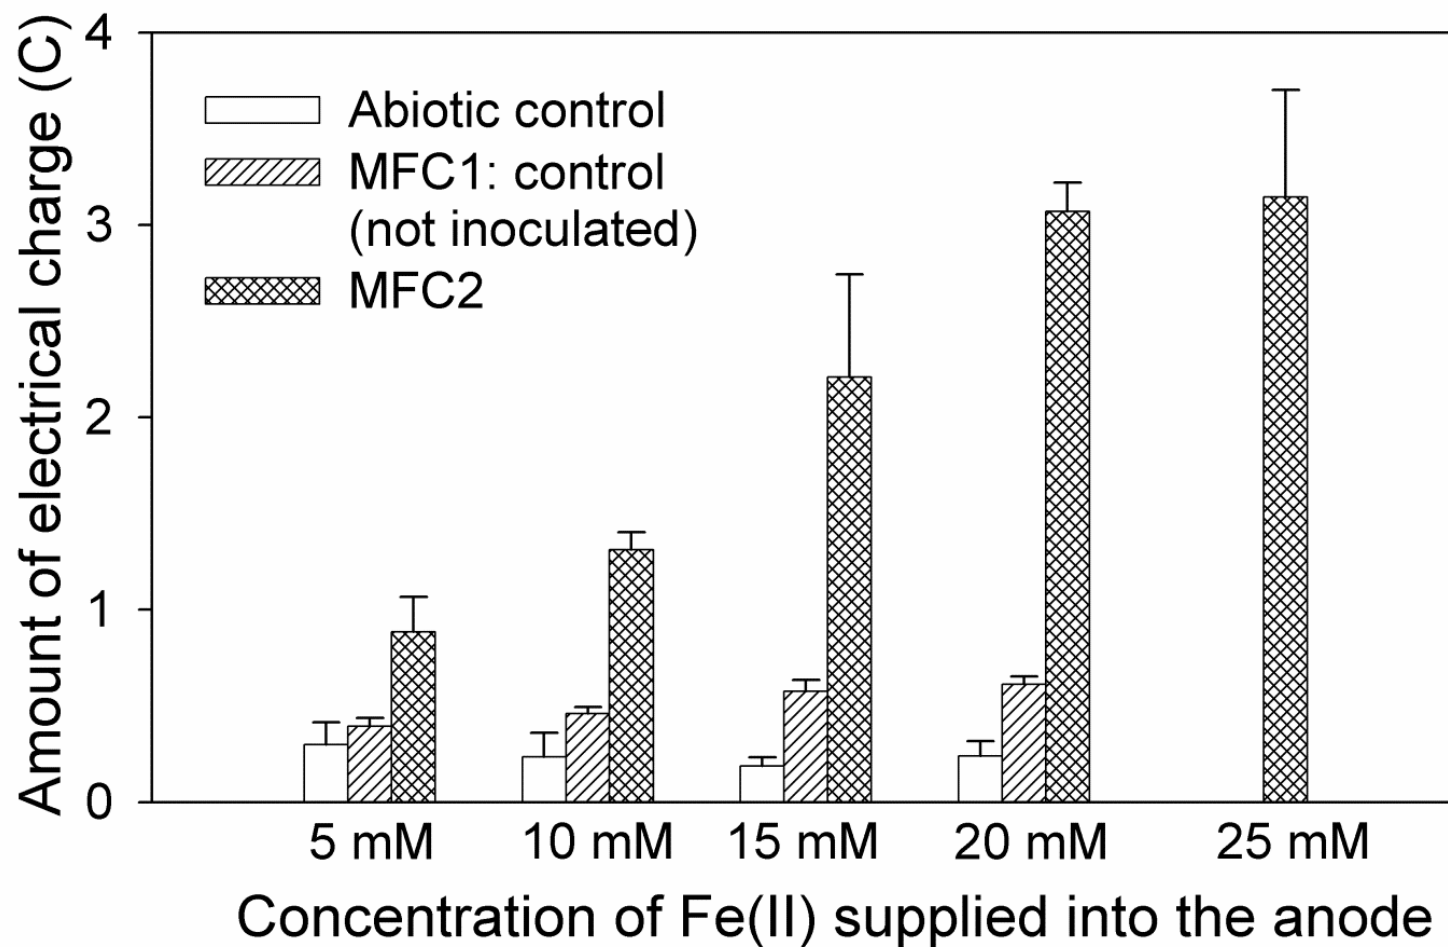

Figure S2. The correlation between the per-batch amount of charge generated and the concentration of  $\text{Fe}^{2+}$  fed to the anode of a LIO-MFC. Notes: 3 LIO-MFCs were tested. The biotic control was not inoculated with any microbial source at the beginning. The abiotic control had its anode chamber sterilized right before the experiments, in which different concentrations of  $\text{Fe}^{2+}$  were tested in only some hours after sterilization. Each MFC was operated with a 10 ohm external resistor, at 25 °C.

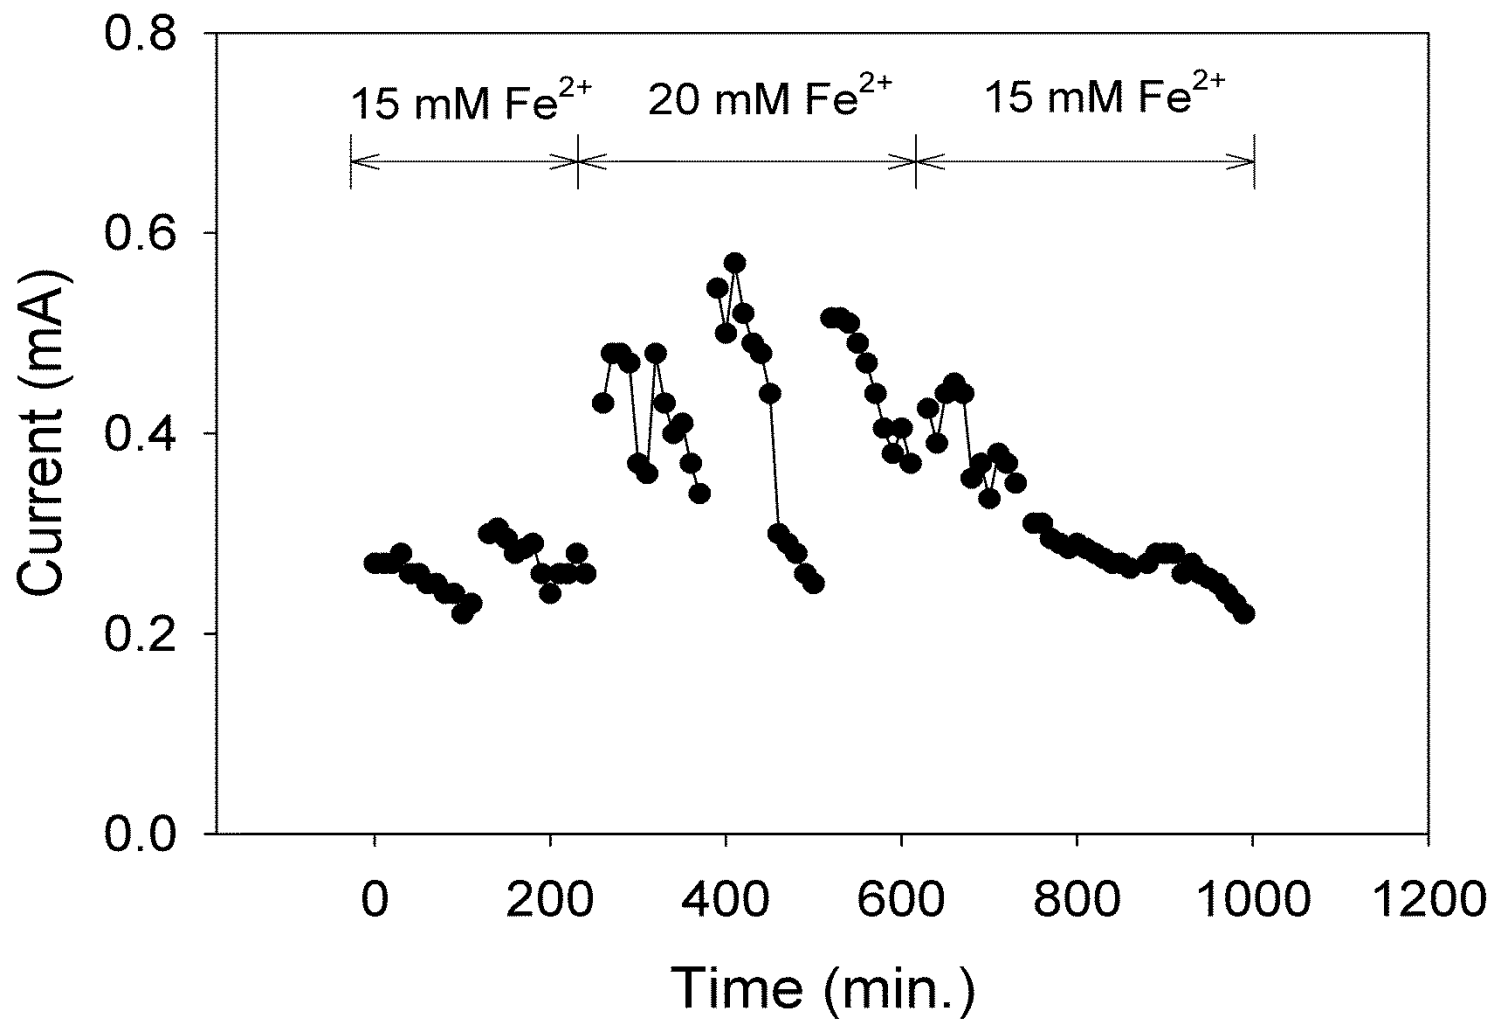

Figure S3. Patterns of the generated current by a LIO-MFC when tested consecutively with the analytes containing 15 mM of Fe<sup>2+</sup> (for 2 batches), 20 mM of Fe<sup>2+</sup> (for 3 batches) and 15 mM of Fe<sup>2+</sup> again (for 3 batches). The duration of a batch is ca. 120 min. The MFC was operated with a 10 ohm external resistor, at 25 °C.

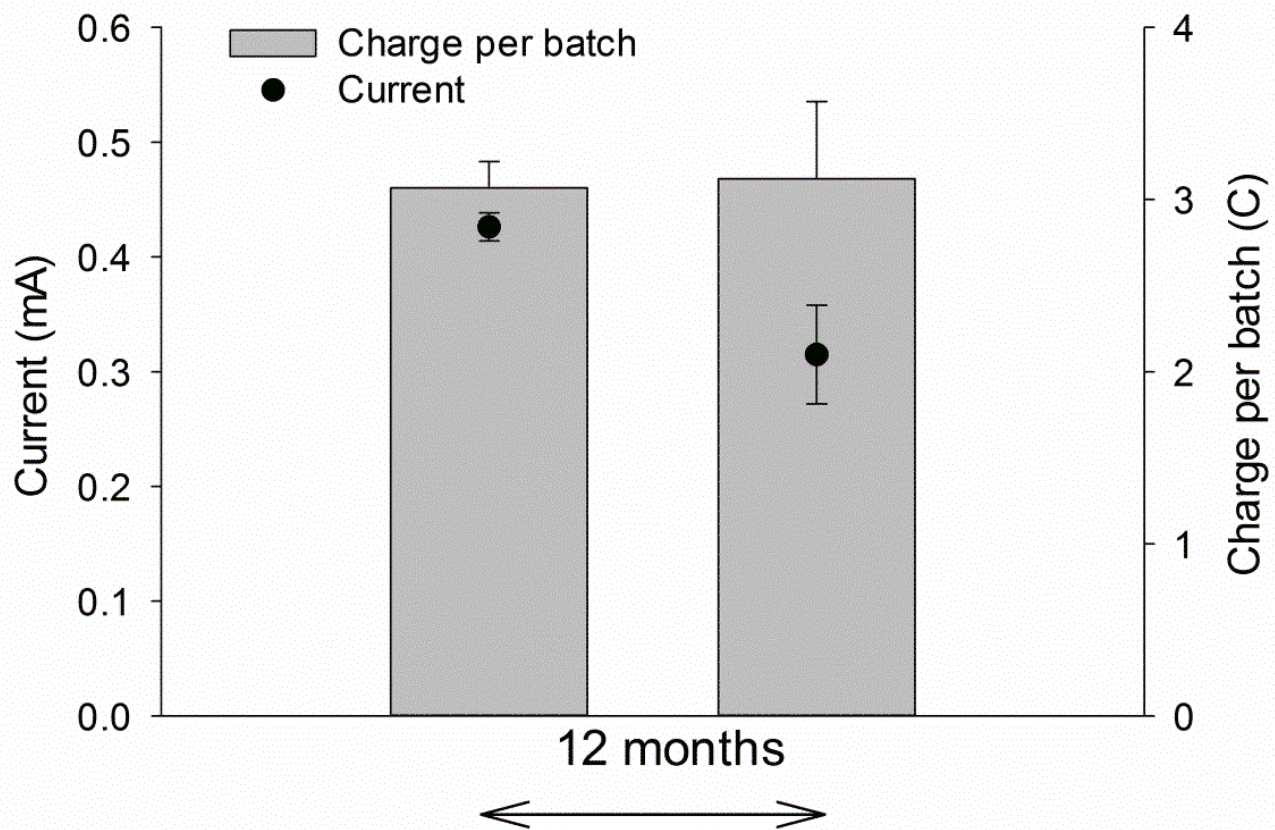

Figure S4. A comparison of the current and the per-batch charge amount produced by a LIO-MFC with those also produced by it after 12 months of operation. The operational conditions were consistent in all experimental cases.
